# Supplementary material
Source: Springer Nature journal article supplement (https://www.springermedizin.de/resource/supplementary/12939_2013_363_MOESM2_ESM.pdf/9550988)
Supplement: MOESM2 [file 9550988]

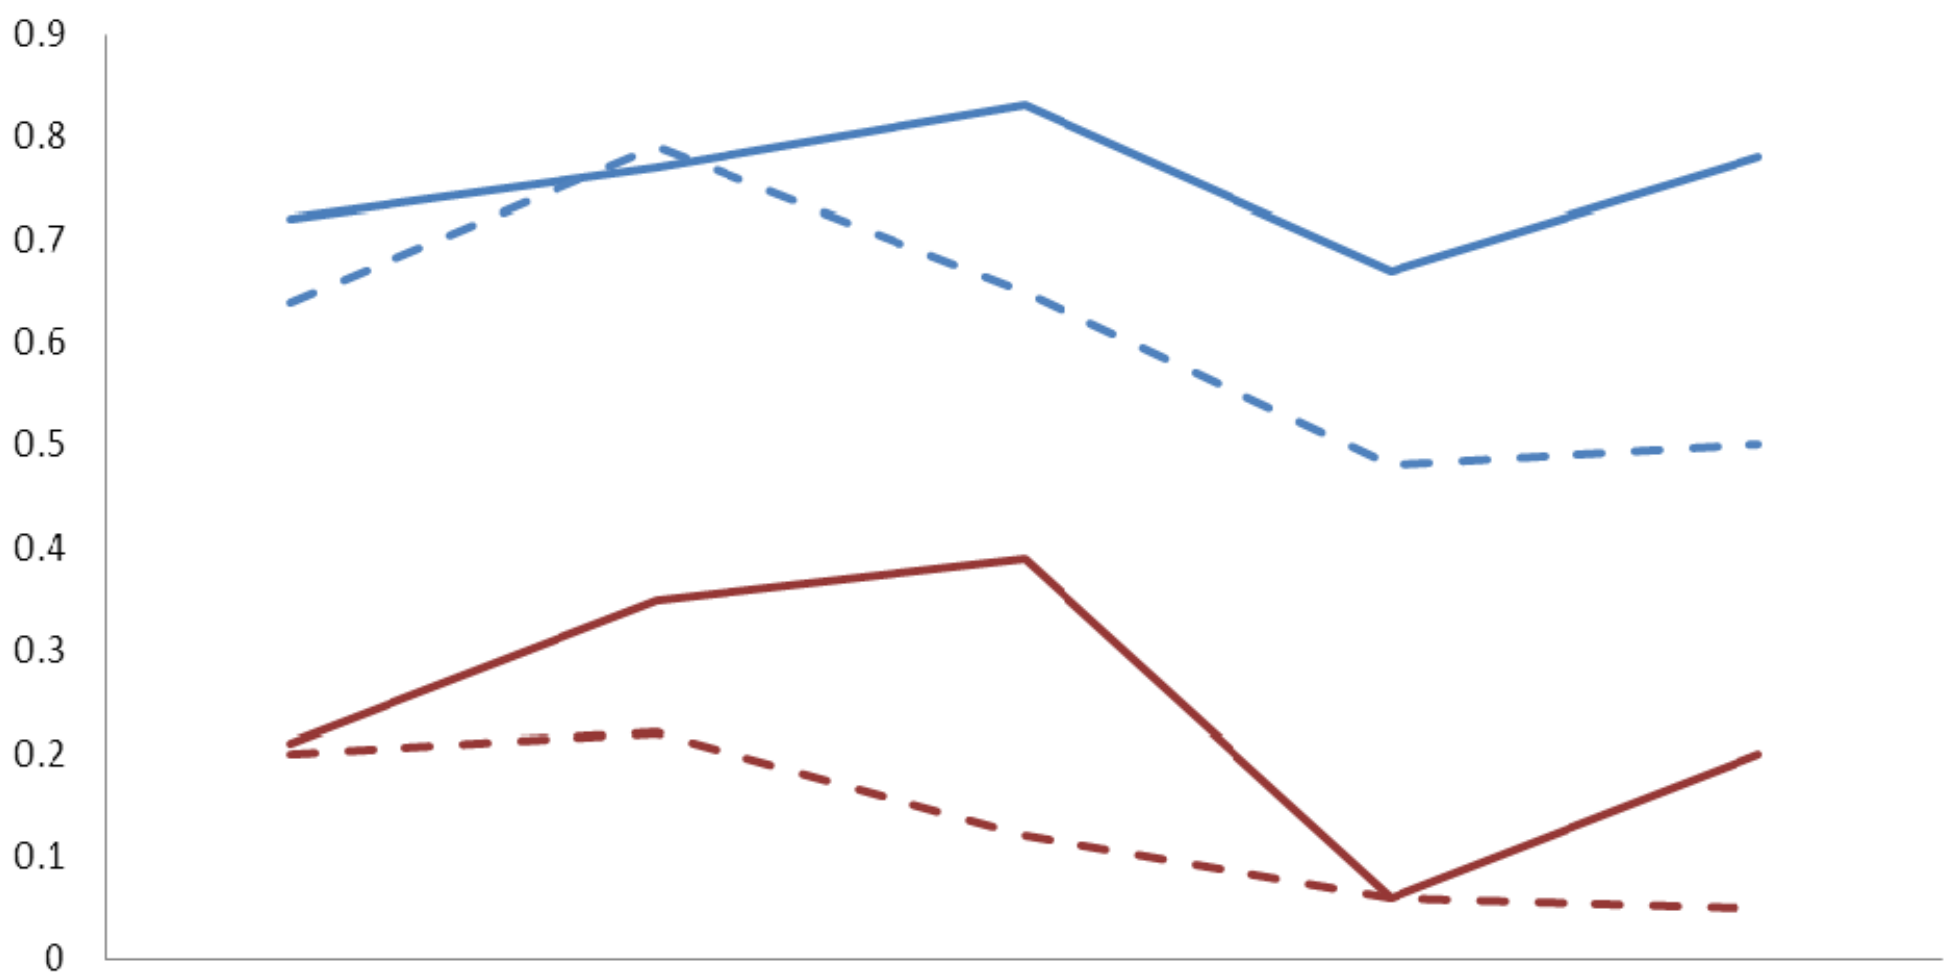

- TAF of High Fertility by Education
- - TAF of non-use of modern contraception by Education
- TAF of High Fertility by Residence
- - TAF of non-use of modern contraception by Residence

**Inequality Trends for non-use of modern contraceptives and fertility rate in Ghana from 1988 to 2008.**
